# Supplementary material for: Encounter tool for Shared Decision Making about Adjuvant Treatment of Lung Cancer: Randomized Clinical Trial
Source: Research Square preprint supplement (doi:10.21203/rs.3.rs-8843093/v1), 2026-05-11
Supplement: Supplementary file 1 [file 5749e476c2393194a1127573.docx]

**RESEARCH PARTICIPANT CONSENT AND PRIVACY AUTHORIZATION FORM**

**Study Title:** Shared Decision-Making Encounter Tool For Adjuvant Treatment of Lung Cancer: Randomized Control Trial **(Clinician Version)**

**IRB#:** 23-003089

**Principal Investigator:** Dr. Konstantinos Leventakos and Colleagues

**Key Study Information**

| This section provides a brief summary of the study. It is important for you to understand why the research is being done and what it will involve before you decide. **Please take the time to read the entire consent form carefully and talk to a member of the research team before making your decision.** You should not sign this form if you have any questions that have not been answered. | |
| --- | --- |
| **It’s Your Choice** | This is a research study. Being in this research study is your choice; you do not have to participate. If you decide to join, you can still stop at any time. You should only participate if you want to do so. You will not lose any services, benefits or rights you would normally have if you choose not to take part. |
| **Research Purpose** | The purpose of this research is to test clinical trial decision aids for patients with lung cancer  You have been asked to take part in this research because you meet with patients who have cancer. |
| **What’s Involved** | If you choose to participate in the study, we will meet with you after you have signed the consent form to go over the tool and how to use it.  You will complete 1 short survey after you have consented to the study, which will include demographic questions.  During study participation you will be asked to allow us to observe your visit with your patient.  This may be done by having a study team member present in the room during the appointment, by video-recording the visit with a small camera, or both. You, your patient, or any visitors can turn off the recorder at any time. If there is a physical examination, the study team observing the visit will step out of the room and the recording device will be placed face down so that it will not capture images of the patient during the physical exam, but audio will continue to record. If you choose not to be video and/or audio recorded, you will not be able to participate in this study.  Each patient will be randomized, 50% of encounters will be using the tool and 50% will be usual care.  You will complete 1 short survey per patient, approximately 5 questions, about the decision-making process. |
| **Key Information** | The risks to participating in this research study are minimal, which means that we do not believe they will be any different than what you would experience at a routine clinical encounter or during your daily life. Sometimes having a conversation observed or recorded can be distressing. If you wish to no longer be observed or recorded, you may ask the study team member observing to exit the room or turn off the recording device.  Although you may not directly benefit from participating in this research study, there is a potential benefit to people in the future as a result of the information gathered in this research study.  Additionally, you may choose not to answer any questions you are uncomfortable answering on the survey. |
| **Learn More** | If you are interested in learning more about this study, read the rest of this form carefully. The information in this form will help you decide if you want to participate in this research or not. A member of our research team will talk with you about taking part in this study before you sign this form. If you have questions at any time, please ask us. |

**Making Your Decision**

Taking part in research is your decision. Take your time to decide. Feel free to discuss the study with your family, friends, and other healthcare providers before you make your decision. Taking part in this study is completely voluntary and you do not have to participate.

If you decide to take part in this research study, you will sign this consent form to show that you want to take part. We will give you either a printed or electronic copy of this form to keep.

For purposes of this form, Mayo Clinic refers to Mayo Clinic in Arizona, Florida and Rochester, Minnesota; Mayo Clinic Health System; and all owned and affiliated clinics, hospitals, and entities.

**Contact Information**

| **If you have questions about …** | **You can contact …** |
| --- | --- |
| - Study tests and procedures - Materials you receive - Research-related appointments - Research-related concern or complaint - Research-related injuries or emergencies - Withdrawing from the research study | **Principal Investigator:** Konstantinos Leventakos, MD, PhD  **Phone:** (507) 293-0569  **Study Team Contact:** Christine Sagen  **Phone:** (507) 422-3425  **Institution Name and Address:**  Mayo Clinic  200 1st Street SW  Rochester, MN 55905 |
| - Rights of a research participant | **Mayo Clinic Institutional Review Board (IRB)**  **Phone:** (507) 266-4000  **Toll-Free:** (866) 273-4681 |
| - Rights of a research participant - Any research-related concern or complaint - Use of your Protected Health Information - Stopping your authorization to use your Protected Health Information - Withdrawing from the research study | **Research Participant Advocate (RPA)**  (The RPA is independent of the Study Team) **Phone:** (507) 266-9372  **Toll-Free:** (866) 273-4681  **E-mail:** [researchparticipantadvocate@mayo.edu](mailto:researchparticipantadvocate@mayo.edu) |
| - Billing or insurance related to this research study | **Patient Account Services**  **Toll-Free:** (844) 217-9591 |

**Other Information:** A description of this clinical trial will be available on <http://www.ClinicalTrials.gov>, as required by U.S. Law. This Website will not include information that can identify you. At most, the Website will include a summary of the results. You can search this Website at any time.

**Why are you being asked to take part in this research study?**

We are inviting you to be part of this research study because you have clinical appointments with patients who have lung cancer.

**Why is this research study being done?**

This research study is being done to test clinical trial decision aids for patients with lung cancer.

**Information you should know**

**Who is Funding the Study?**

Emerson Collective, LLC is funding this study.

**How long will you be in this research study?**

You will be in this study until your last patient is enrolled.

**What will happen to you while you are in this research study?**

If you agree to participate, you will be asked to participate in the following:

- You will be asked to allow us to observe your visit with your patient. This may be done by having a study team member present in the room during the appointment, by video-recording the visit with a small camera, or both. You, your patient, or any visitors can turn off the recorder at any time for part of the visit. If there is a physical examination, the study team observing the visit will step out of the room and the recording device will be placed face down so that it will not capture images of the physical exam, but audio will continue to record.
- You will be asked to give permission for us to take notes or record observations of things you say or do during your discussion with your patient.
- In some cases, you may be asked a few follow-up questions at the end of the appointment.
- You will complete 1 short survey per patient, approximately 5 questions, about the decision-making process.
- You will complete 1 short survey at the time of enrollment, which will include demographic questions.
- We will ask your gender and year of birth and record that information in our dataset.

**What are the possible risks or discomforts from being in this research study?**

The risks to participating in this research study are minimal, which means that we do not believe they will be any different than what you would experience at a routine clinical encounter or during your daily life. Sometimes having a conversation observed or recorded can be distressing. If you wish to no longer be observed or recorded, you may ask the study team member observing to exit the room or turn off the recording device for part of the encounter. Results from the study will be reported in aggregate and will not individually identify or evaluate work performance of providers.

As with all research, there is a chance that confidentiality could be compromised; however, we take precautions to minimize this risk.

**Are there reasons you might leave this research study early?**

If you leave this research study early, or are withdrawn from the study, no more information about you will be collected; however, information already collected about you in the study may continue to be used.

**What are the possible benefits from being in this research study?**

Although you may not directly benefit from participating in this research study, there is a potential benefit to people with non-small cell lung cancer in the future as a result of the information gathered in this research study.

**What alternative do you have if you choose not to participate in this**

**research study?**

This study is only being done to gather information. You may choose not to take part in this study.

**Will you be paid for taking part in this research study?**

You will not be paid for taking part in this study.

**Will your information or samples be used for future research?**

Unless you give your permission below, your information and/or video and audio recordings collected for this study will not be used or shared for future research, even if the identifiable information such as your name and other identifiable information are removed.

We would like to keep your information and/or video and audio recordings for future research. You can still take part in this current study even if you don’t want your information and/or video and audio recordings used for future research.

Researchers at Mayo Clinic who aren’t involved with this study may ask to use your information and/or video and audio recordings for future research. Researchers at other institutions may also ask for a part of your information and/or video and audio recordings for future studies. Unless you indicate otherwise, the future research may be on any topic.

No direct benefits to you are expected from the future research. Your information and/or video and audio recordings will only be shared consistent with your consent, and with all applicable laws and regulations.

Please read the following statements and mark your choices:

I permit my information and/or video and audio recordings to be stored and used in future research at Mayo Clinic to learn about, prevent, or treat any other health problems:

{{$QNS1D }}

{{$QNS1IN}}

{{$QNS1N}}

{{$QNS1Y}}

Yes  No Please initial here: ________Date: ________

I permit Mayo Clinic to give my information and/or video and audio recordings to researchers at other institutions:

{{$QNS2IN}}

{{$QNS2D }}

{{$QNS2N}}

{{$QNS2Y}}

Yes  No Please initial here: ________Date: ________

You may withdraw your consent for future use of your information and/or video and audio recordings at any time, by writing to the Principal Investigator at the address provided in the “Contact Information" section of this consent form.

Your information and/or video and audio recordings would be removed from any repository where they are stored, if possible. Information and/or video and audio recordings already distributed for research use will not be retrieved.

**How will your privacy and the confidentiality of your records be protected?**

Mayo Clinic is committed to protecting the confidentiality of information obtained about you in connection with this research study. Your privacy is very important to us. We follow several procedures in order to protect your confidentiality. You will be given a unique study code that will be used instead of your name for the purposes of identifying and tracking you and all other participants in the study. If some of the information is reported in published medical journals or scientific discussions, it will be done in a way that does not directly identify you. The video files used in this study will be immediately transferred to secure and password-protected servers from which only authorized research personnel can conduct evaluations, and video files will be deleted from the recorder immediately following the visit.

Similarly, all paper files will be stored in locked file cabinets to which only select personnel have access. If the results of the research are made public, information that identifies you will not be used. Representatives from the Mayo Clinic Institutional Review Board (the committee that reviews, approves, and monitors research on human subjects) may inspect study records during internal auditing procedures. However, these individuals are required to keep all information confidential.

Audio recordings may be sent for transcription to Landmark Transcription, a Mayo Clinic approved transcription service. Additionally, your information may be stored on a password protected USB drive.

**Your Rights and Permissions**

Participation in this study is completely voluntary. You have the right not to participate at all. Even if you decide to be part of the study now, you may change your mind and stop at any time. You do not have to sign this form, but if you do not, you cannot take part in this research study.

Deciding not to participate or choosing to leave the study will not result in any penalty. Saying ‘no’ will not harm your relationship with your own doctors or with Mayo Clinic.

If you cancel your permission for Mayo Clinic to use or share your information, your participation in this study will end and no more information about you will be collected; however, information already collected about you in the study may continue to be used.

You can cancel your permission for Mayo Clinic to use or share your information at any time by sending a letter to the address below:

Mayo Clinic

Office for Human Research Protection

ATTN: Notice of Revocation of Authorization

200 1st Street SW

Plummer Building PL 3-02

Rochester, MN 55905

Alternatively, you may cancel your permission by emailing the Mayo Clinic Research Participant Advocate at: [researchparticipantadvocate@mayo.edu](mailto:researchsubjectadvocate@mayo.edu).

Please be sure to include in your letter or email:

- The name of the Principal Investigator,
- The study IRB number and /or study name, and
- Your contact information.

Your permission for Mayo Clinic to use and share your information lasts until the end of this study, unless you cancel it. The study does not end until all data has been collected, checked (or audited), analyzed, and reported. Because research is an ongoing process, we cannot give you an exact date when the study will end. Sometimes this can be years after your study visits and/or activities have ended.

**Enrollment and Permission Signatures**

**Your signature documents your permission to take part in this research.**

{{!$sigWitness}}

{{$dteParticipantSig }}

{{$prtPartName }}

Printed Name Date (mm/dd/yyyy) Time (hh:mm am/pm)

{{$sigParticipant }}

**_______________________________**

Signature

**Person Obtaining Consent**

- I have explained the research study to the participant.
- I have answered all questions about this research study to the best of my ability.

{{$prtPOCName }}

{{$dtePOCSig }}

Printed Name Date (mm/dd/yyyy) Time (hh:mm am/pm)

{{$sigPOC }}

**_______________________________**

Signature
