# Supplementary material for: Encounter tool for Shared Decision Making about Adjuvant Treatment of Lung Cancer: Randomized Clinical Trial
Source: Research Square preprint supplement (doi:10.21203/rs.3.rs-8843093/v1), 2026-05-11
Supplement: Supplementary file 2 [file 72bf579ce989ee34b04d9da1.pdf]

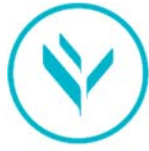

National  
Philanthropic  
Trust

*Your partner in giving*

165 Township Line Road, Suite 1200  
Jenkintown, PA 19046-3594  
P: (888) 878-7900  
F: (215) 277-3029  
[www.nptrust.org](http://www.nptrust.org)

March 20, 2023

Brandon Stenseth  
Gift Planning Administrator  
Mayo Clinic  
200 1st Street SW  
Rochester, MN 55905

Dear Brandon:

National Philanthropic Trust (NPT) (EIN: 23-7825575) is pleased to present you with a charitable grant from a donor-advised fund. The funds have been wired to your account.

|                 |                                                                                                                                                                                                                                           |
|-----------------|-------------------------------------------------------------------------------------------------------------------------------------------------------------------------------------------------------------------------------------------|
| Recommended by: | Emerson Collective                                                                                                                                                                                                                        |
| Amount:         | \$176,922.90                                                                                                                                                                                                                              |
| Purpose:        | At the discretion of the charity, support for the following investigator and project: Konstantinos Leventakos, Shared Decision-Making Encounter Tool For Adjuvant Treatment of Lung Cancer. This grant may not exceed 15% indirect costs. |

Please consider this grant anonymous internally and externally and do not include Emerson Collective in your internal or public listings, except in scientific publications. In scientific publications, acknowledge "Emerson Collective" as the donor. Please submit annual progress and financial reporting to [NPTECF@nptrust.org](mailto:NPTECF@nptrust.org). The Emerson Collective team has also requested that you continue to update deliverables in your Survey Monkey Apply account.

NPT provides donors with a charitable gift receipt when they contribute to their donor-advised fund account. Your organization should not provide a tax receipt for this grant.

This grant may only be used for your organization's tax-exempt purposes, as specified above. This grant may not be used to provide anyone with a more than incidental private benefit, and it may not be used to carry on propaganda, to attempt to influence legislation or the outcome of any public election, in support of any political campaign or candidate for public office, or for any other form of lobbying.

If you have any questions about this grant, please contact the Philanthropic Solutions team at National Philanthropic Trust at (888) 878-7900 or [NPTECF@nptrust.org](mailto:NPTECF@nptrust.org).

Sincerely,

Eileen R. Heisman  
President/CEO  
National Philanthropic Trust
